# Supplementary material for: The Determinants of Greenhouse Gas Emissions: Empirical Evidence from Canadian Provinces
Source: MDPI journal article supplement (doi:10.3390/su16062498), 2024-03-18
Supplement: s1 [file s1]

**Table S1.** Pooled Ordinary Least Square Estimates for Extended Model 1.

| VARIABLES                                            | (9)          | (9a)          | (10)       | (10a)        | (11)       | (11a)        | (12)         | (12a)         |
|------------------------------------------------------|--------------|---------------|------------|--------------|------------|--------------|--------------|---------------|
| lnpop                                                | -0.0974***   | -0.222*       | -0.0910*** | 0.211**      | -0.0647*** | 0.190*       | -0.099***    | -0.226*       |
| lnage                                                | -2.990***    | -1.642***     | -2.056***  | -0.618***    | -2.086***  | -0.656***    | -3.010***    | -1.621***     |
| lnavey                                               | 0.659***     | 0.481***      | 0.458**    | 0.204**      | 0.300      | 0.253***     | 0.670***     | 0.470***      |
| lnoilpc                                              | 0.217***     | 0.140***      | 0.228***   | 0.0683***    | 0.227***   | 0.0675***    | 0.217***     | 0.139***      |
| lngaspc                                              | 0.0405***    | 0.00719       | 0.0468***  | 0.00560      | 0.0368***  | 0.00576      | 0.0405***    | 0.00710       |
| lnmvpc                                               | 0.667***     | -0.111*       | -          | -            | 0.619***   | -0.0845      | 0.667***     | -0.110*       |
| lnlivestpc                                           | -            | -             | 0.0694***  | 0.467***     | 0.0619***  | 0.465***     |              |               |
| Agv/gdp                                              | -            | -             | -          | -            | -          | -            | -0.00066     | 0.00114       |
| <b>Dummy for provinces (Base category - Ontario)</b> |              |               |            |              |            |              |              |               |
| NFL                                                  |              | -0.629*       |            | 1.806***     |            | 1.752***     |              | -0.642*       |
| PEI                                                  |              | -0.892*       |            | 0.344        |            | 0.276        |              | -0.921*       |
| NS                                                   |              | -0.0992       |            | 1.130***     |            | 1.080***     |              | -0.112        |
| NB                                                   |              | 0.0269        |            | 1.258***     |            | 1.235***     |              | 0.0123        |
| QC                                                   |              | -0.265***     |            | -0.162**     |            | -0.162**     |              | -0.270***     |
| Man                                                  |              | -0.411        |            | -0.226       |            | -0.260       |              | -0.430        |
| Sask                                                 |              | 0.453*        |            | 0.463**      |            | 0.446**      |              | 0.432*        |
| Alb                                                  |              | 0.739***      |            | 0.493***     |            | 0.490***     |              | 0.734***      |
| B.C                                                  |              | -0.279**      |            | 0.205**      |            | 0.190*       |              | -0.284**      |
| Constant                                             | 7.024***     | 4.010***      | 5.496***   | 3.090***     | 7.561***   | 2.704***     | 6.986***     | 4.061***      |
| <b>Obs.</b>                                          | 300          | 300           | 300        | 300          | 300        | 300          | 300          | 300           |
| <b>R-squared</b>                                     | 0.803        | 0.977         | 0.797      | 0.984        | 0.812      | 0.985        | 0.803        | 0.977         |
| <b>CSD</b>                                           | <b>1.967</b> | <b>15.915</b> | 0.286      | <b>5.276</b> | 0.750      | <b>4.629</b> | <b>2.154</b> | <b>15.395</b> |

Note: \*\*\* p<0.01, \*\* p<0.05, \* p<0.1. Ontario is the base category, and NFL = Newfoundland and Labrador, PEI = Prince Edward Island, NS = Nova Scotia, NB = New Brunswick, QC = Quebec, Man = Manitoba, Sask = Saskatchewan, Alb = Alberta, B.C = British Columbia, while lnpop, lnage, lnavey, lnolpc, lngaspc, lnmvpc, lnlivestpc, and agv/gdp denotes the log of population, log of age, log of average income, log of oil production per capita, log of gas production per capita, log of motor vehicles registered per capita, log of livestock per capita, and agriculture value-added as a percent of GDP respectively. CSD is a test statistic (t-stat) Pesaran's (2015) residual-based cross section dependence test, while the bold letter shows p<0.05.

**Table S2.** Pooled Ordinary Least Square Estimates for Extended Model 2.

| VARIABLES                                            | (13)      | (13a)        | (14)         | (14a)        | (15)         | (15a)        | (16)         | (16a)        |
|------------------------------------------------------|-----------|--------------|--------------|--------------|--------------|--------------|--------------|--------------|
| lnpop                                                | 0.0231    | 0.167        | -0.0666***   | 0.192*       | -0.0891***   | 0.191*       | 0.0398**     | 0.251**      |
| lnage                                                | -0.989*** | -0.628***    | -1.650***    | -0.669***    | -2.294***    | -0.655***    | -0.398       | -0.430*      |
| lnavey                                               | 0.148     | 0.266***     | 0.364**      | 0.251***     | 0.317*       | 0.253***     | 0.201        | 0.374***     |
| lnoilpc                                              | 0.239***  | 0.0691***    | 0.157***     | 0.0667***    | 0.234***     | 0.0676***    | 0.168***     | 0.0667***    |
| lngaspc                                              | 0.0129*** | 0.00394      | 0.0677***    | 0.00576      | 0.0444***    | 0.00576      | 0.0363***    | 0.00714      |
| lnmvpc                                               | 0.450***  | -0.0960*     | 0.276**      | -0.0829      | 0.561***     | -0.0844      | 0.166*       | -0.0749      |
| lnlivestpc                                           | 0.0769*** | 0.438***     | 0.00284      | 0.466***     | 0.0421**     | 0.464***     | 0.0355**     | 0.443***     |
| lnelecint                                            | 0.108***  | 0.00928      |              |              |              |              | 0.110***     | 0.00493      |
| lnhdd                                                |           |              | 0.762***     | -0.0588      |              |              | 0.721***     | -0.104       |
| lncdd                                                |           |              |              |              | 0.0620*      | -0.00148     | -0.0447*     | -0.0136      |
| D2005                                                |           |              |              |              |              |              | -0.00418     | -0.0740***   |
| <b>Dummy for provinces (Base category - Ontario)</b> |           |              |              |              |              |              |              |              |
| NFL                                                  |           | 1.627***     |              | 1.777***     |              | 1.750***     |              | 1.931***     |
| PEI                                                  |           | 0.201        |              | 0.292        |              | 0.278        |              | 0.608        |
| NS                                                   |           | 0.986***     |              | 1.089***     |              | 1.080***     |              | 1.227***     |
| NB                                                   |           | 1.153***     |              | 1.252***     |              | 1.236***     |              | 1.418***     |
| QC                                                   |           | -0.141**     |              | -0.154**     |              | -0.162**     |              | -0.0847      |
| Man                                                  |           | -0.246       |              | -0.235       |              | -0.259       |              | -0.00995     |
| Sask                                                 |           | 0.452**      |              | 0.471**      |              | 0.446**      |              | 0.674***     |
| Alb                                                  |           | 0.515***     |              | 0.505***     |              | 0.489***     |              | 0.612***     |
| B.C                                                  |           | 0.191*       |              | 0.175*       |              | 0.188*       |              | 0.202*       |
| Constant                                             | 4.655***  | 2.426***     | -1.369       | 3.252***     | 7.776***     | 2.699***     | -4.113**     | 1.349        |
| <b>Obs.</b>                                          | 300       | 300          | 300          | 300          | 300          | 300          | 300          | 300          |
| <b>R-squared</b>                                     | 0.912     | 0.985        | 0.830        | 0.985        | 0.814        | 0.985        | 0.929        | 0.986        |
| <b>CSD</b>                                           | -0.723    | <b>4.342</b> | <b>3.502</b> | <b>4.546</b> | <b>2.317</b> | <b>4.423</b> | <b>2.279</b> | <b>2.411</b> |

Note: \*\*\* p<0.01, \*\* p<0.05, \* p<0.1. Ontario is the base category, and NFL = Newfoundland and Labrador, PEI = Prince Edward Island, NS = Nova Scotia, NB = New Brunswick, QC = Quebec, Man = Manitoba, Sask = Saskatchewan, Alb = Alberta, B.C = British Columbia, while lnpop, lnage, lnavey, lnolpc, lngaspc, lnmvpc, lnlivestpc, lnlecint, lnhdd and lncdd denotes the log of population, log of age, log of average income, log of oil production per capita, log of gas production per capita, log of motor vehicles registered per capita, log of livestock per capita, log of electricity generation intensity, log of heating degree days and log of cooling degree days respectively. While the D2005 is a dummy variable that signifies the years beginning with 2005, as Canada signed the Paris Agreement to reduce its greenhouse gas emissions by 30% from 2005 levels by 2020 and net-zero by 2050. CSD is a test statistic (t-stat) Pesaran's (2015) residual-based cross section dependence test, while the bold letter shows p<0.05.
